# Supplementary material for: Site occupation and upconversion process enabled multicolor emission in a Gd3GaO6:Bi3+,Er3+ phosphor for quad-mode anti-counterfeiting
Source: Royal Society of Chemistry journal article supplement (doi:10.1039/d3qi01525d), 2023-01-01
Supplement: d3qi01525d1.pdf [file d3qi01525d1.pdf]

## Site Occupation and Upconversion Process Enabled Multicolor Emission in

### Gd<sub>3</sub>GaO<sub>6</sub>:Bi<sup>3+</sup>,Er<sup>3+</sup> Phosphor for Quad-modes Anti-Counterfeiting

Zhijun Li<sup>a,b</sup>, Zeyu Lyu<sup>\*a</sup>, Pengcheng Luo<sup>a,b</sup>, Shuai Wei<sup>a,b</sup>, Chengyu Zhuo<sup>a,b</sup>, Dashuai Sun<sup>a</sup>,  
Sida Shen<sup>a</sup>, and Hongpeng You<sup>\*a,b,c</sup>

a. Ganjiang Innovation Academy, Chinese Academy of Sciences, Ganzhou 341000, P.R. China.

b. School of Chemistry and Chemical Engineering, Nanchang University, Nanchang 330031, P.R. China.

c. State Key Laboratory of Rare Earth Resource Utilization, Changchun Institute of Applied Chemistry, Chinese Academy of Sciences, Changchun 130022, P. R. China.

\*E-mail address: hpyou@ciac.ac.cn, zylyu@gia.cas.cn.

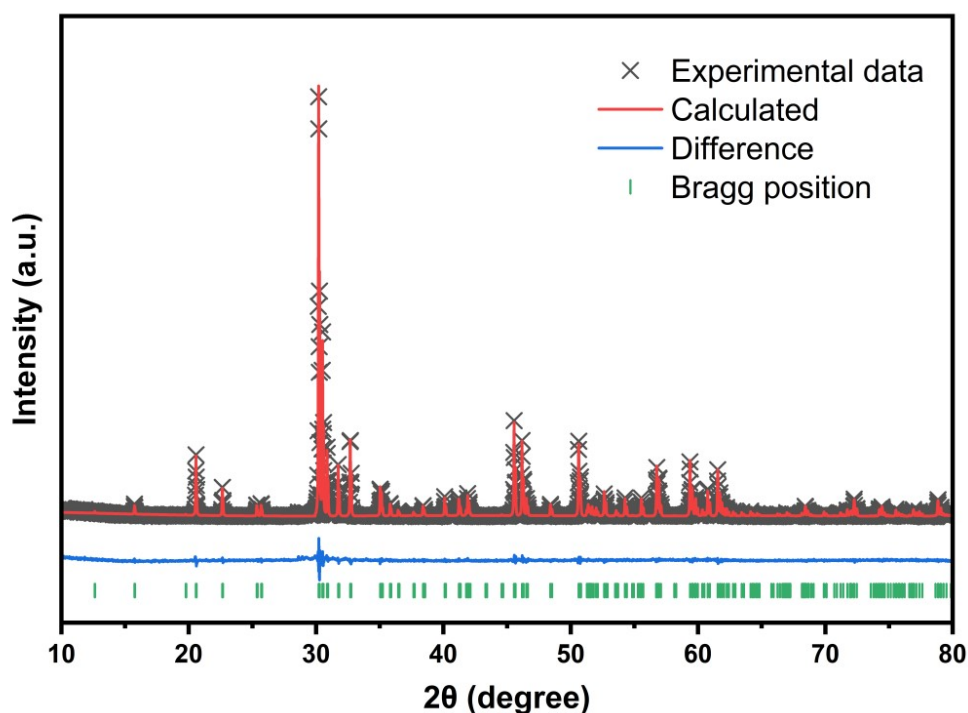

**Figure S1.** Rietveld refinement of the XRD pattern of GGO:0.05Bi<sup>3+</sup>,0.04Er<sup>3+</sup>.

**Table S1.** Lattice parameters of GGO:xBi<sup>3+</sup> phosphors obtained from the Rietveld XRD refinement.

| Sample      | GGO:0.03Bi <sup>3+</sup> | GGO:0.05Bi <sup>3+</sup> | GGO:0.07Bi <sup>3+</sup> | GGO:0.09Bi <sup>3+</sup> | GGO:0.12Bi <sup>3+</sup> |
|-------------|--------------------------|--------------------------|--------------------------|--------------------------|--------------------------|
| Space group | Cmc21                    | Cmc21                    | Cmc21                    | Cmc21                    | Cmc21                    |
| Symmetry    | Orthorhombic             | Orthorhombic             | Orthorhombic             | Orthorhombic             | Orthorhombic             |
| a, Å        | 8.994740                 | 8.995690                 | 8.996921                 | 8.998005                 | 8.998291                 |
| b, Å        | 11.281330                | 11.281572                | 11.282493                | 11.282776                | 11.283068                |

|                           |          |          |          |          |          |
|---------------------------|----------|----------|----------|----------|----------|
| c, Å                      | 5.481872 | 5.482107 | 5.482294 | 5.482681 | 5.482857 |
| $\alpha = \beta = \gamma$ | 90°      | 90°      | 90°      | 90°      | 90°      |
| V                         | 556.260  | 556.354  | 556.495  | 556.615  | 556.665  |
| Rwp, %                    | 7.68     | 8.23     | 10.55    | 8.17     | 8.53     |
| Rp, %                     | 6.57     | 7.08     | 8.83     | 6.99     | 7.14     |
| $\chi^2$                  | 2.140    | 2.495    | 2.170    | 2.414    | 2.261    |

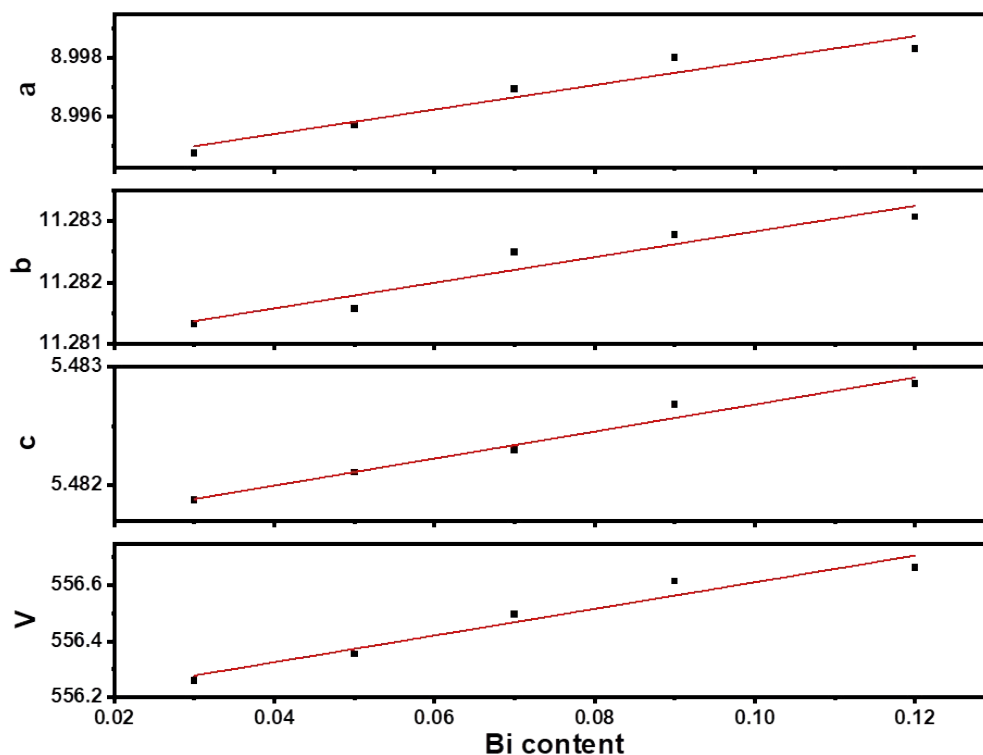

**Figure S2.** Unit cell parameters of the GGO: $x\text{Bi}^{3+}$  phosphors.

**Table S2.** Selected bond lengths of GGO:0.01Bi<sup>3+</sup>.

|         | Bond Lengths (Å) |         | Bond Lengths (Å) |  |
|---------|------------------|---------|------------------|--|
| Gd1-O1  | 2.40711          | Gd2-O1  | 2.4669           |  |
| Gd1-O1  | 2.3018           | Gd2-O1  | 2.4669           |  |
| Gd1-O2  | 2.17711          | Gd2-O2  | 2.3739           |  |
| Gd1-O2  | 2.3559           | Gd2-O2  | 2.3739           |  |
| Gd1-O3  | 2.53911          | Gd2-O3  | 2.28011          |  |
| Gd1-O3  | 2.6396           | Gd2-O3  | 2.28011          |  |
| Gd1-O4  | 2.4118           | Gd2-O4  | 2.45710          |  |
| Average | 2.405            | Average | 2.385            |  |

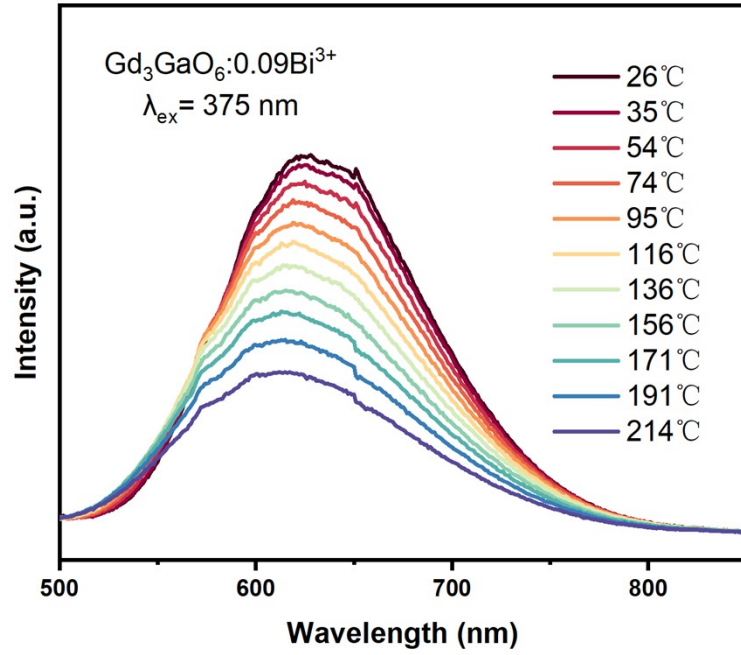

**Figure S3.** The temperature-dependent PL spectra of GGO:0.09Bi<sup>3+</sup>.

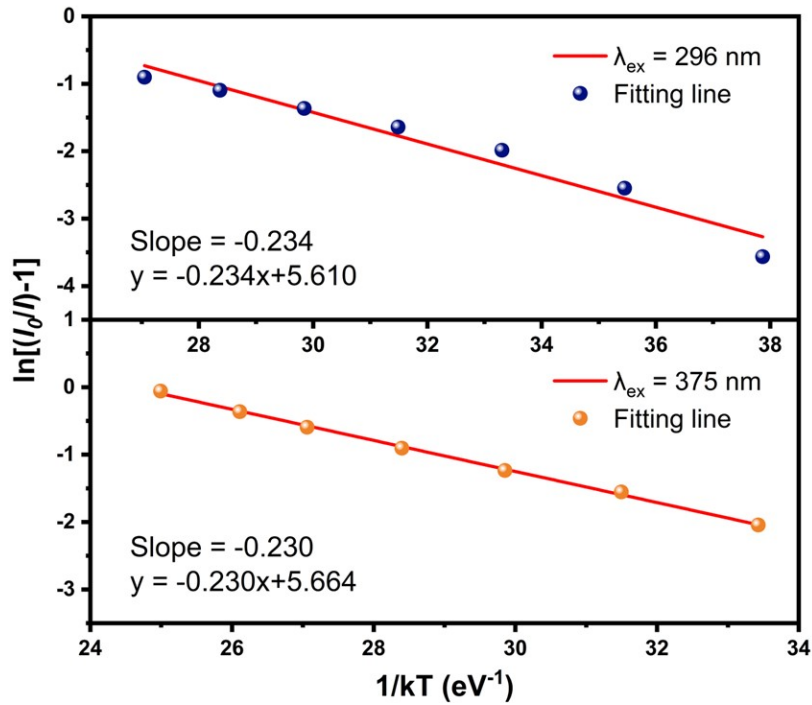

**Figure S4.** Activation energy of Bi(I) in GGO:0.01Bi<sup>3+</sup> and Bi(II) in GGO:0.09Bi<sup>3+</sup>.

As the temperature increases, the excited electrons diffuse to higher vibrational levels, and the energy barrier between the cross points and the excited state <sup>3</sup>P<sub>1</sub> is called the activation energy. This activation energy ( $\Delta E_a$ ) can be calculated by the Arrhenius equation:<sup>1,</sup>

$$I_T = \frac{I_0}{1 + c \exp\left(-\frac{\Delta E_a}{kT}\right)}$$

Wherein  $I_T$  and  $I_0$  represent the PL intensity at the experimental temperature and room temperature, respectively,  $k$  is the Boltzmann constant and  $c$  is a constant. **Figure S4** shows the linear curve of  $\ln[(I_0/I_T) - 1]$  versus  $1/kT$  with a slope of  $-\Delta E_a$ . Consequently, the activation energies  $\Delta E_a$  for Bi(I) and Bi(II) are calculated to be 0.234 eV and 0.230 eV, respectively. From the above study, it can be seen that the thermal stability of Bi(I) and Bi(II) is similar, which is coherent with the calculations. The thermal quenching of the  $\text{Bi}^{3+}$  ions can be illustrated by the coordinate diagram, as shown in **Figure S5**. When a luminescent material is excited by UV light, the ground state electrons absorb energy and transition to the excited state. The excited electrons are then stabilized at the lower energy levels of the excited state by a lattice relaxation process and subsequently release photons by a direct transition back to the ground state. As the temperature increases, the excited electron overcomes the energy barrier ( $\Delta E_a$ ) with the help of phonons and achieves a transfer from the lower energy level of the excited state to the intersection of the ground and excited states, and then returns to the ground state through this intersection in a non-radiative transition.

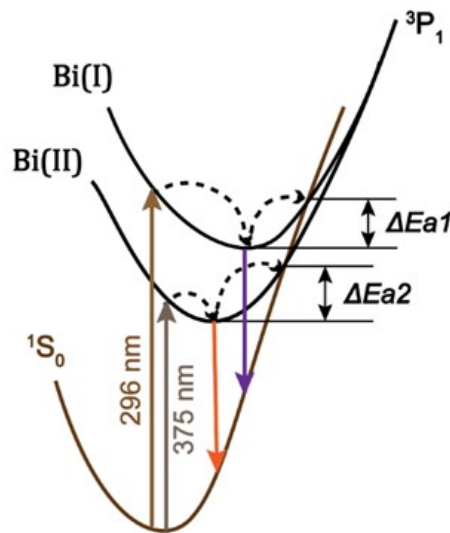

**Figure S5.** Coordinates of the configuration of the  $\text{Bi}^{3+}$ .

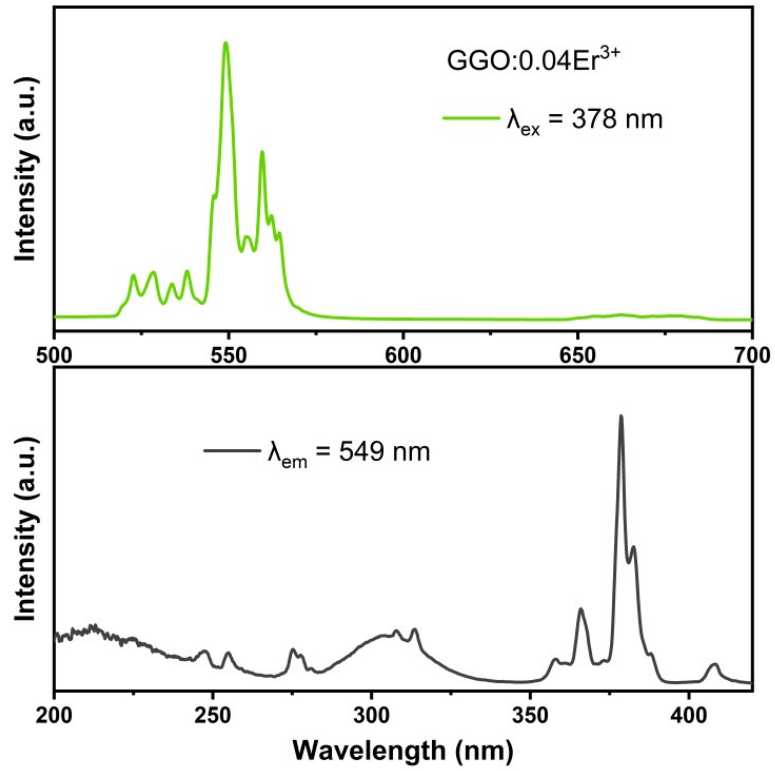

Figure S6. Downshifting PL and PLE spectra of GGO:Er<sup>3+</sup>.

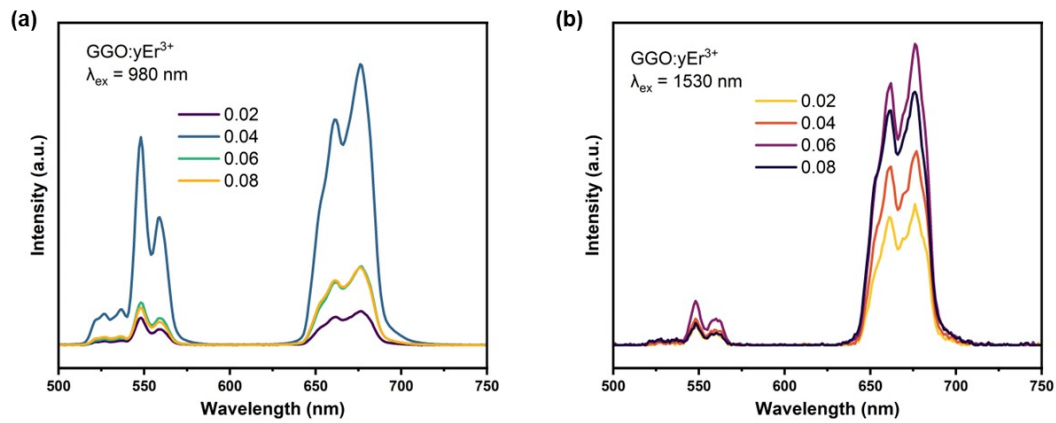

Figure S7. PL spectra of GGO:yEr<sup>3+</sup> under (a) 980 nm excitation and (b) 1530 nm excitation.

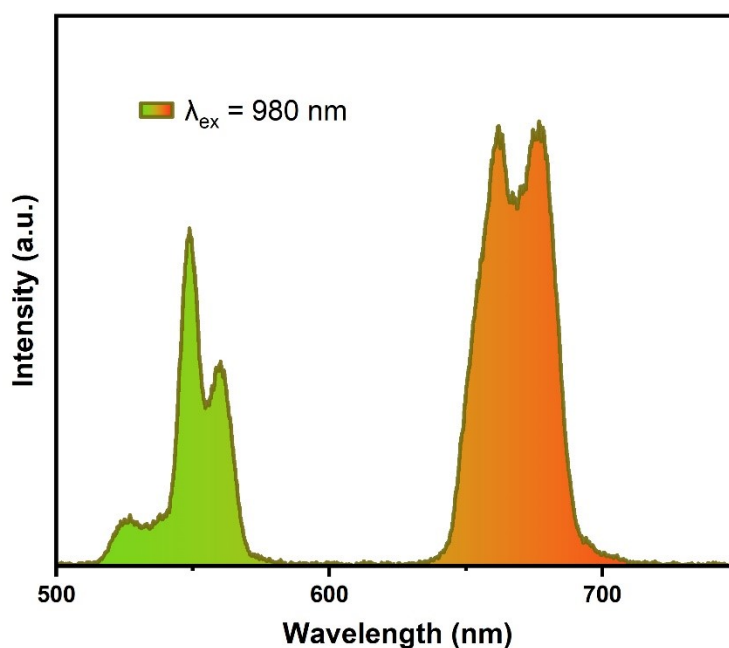

**Figure S8.** PL spectra of GGO:0.05Bi<sup>3+</sup>,0.04Er<sup>3+</sup> under the excitation of 980 nm.

Reference:

1. Y. Guo, S. H. Park, B. C. Choi, J. H. Jeong and J. H. Kim, Dual-Mode Manipulating Multicenter Photoluminescence in a Single-Phased Ba<sub>9</sub>Lu<sub>2</sub>Si<sub>6</sub>O<sub>24</sub>:Bi<sup>3+</sup>,Eu<sup>3+</sup> Phosphor to Realize White Light/Tunable Emissions, *Scientific Reports*, 2017, **7**, 15884.
2. G. Xing, Y. Feng, M. Pan, Y. Wei, G. Li, P. Dang, S. Liang, M. S. Molokeyev, Z. Cheng and J. Lin, Photoluminescence Tuning in a Novel Bi<sup>3+</sup>/Mn<sup>4+</sup> Co-Doped La<sub>2</sub>ATiO<sub>6</sub>:(A = Mg, Zn) Double Perovskite Structure: Phase Transition and Energy Transfer, *Journal of Materials Chemistry C*, 2018, **6**, 13136-13147.
